# Supplementary material for: Construction of a faculty competency model for medical simulation education integrated with GenAI: A mixed study based on the perspective of medical students
Source: Research Square preprint supplement (doi:10.21203/rs.3.rs-6595296/v1), 2025-06-10
Supplement: Supplementary file 1 [file eddd28877485032a450558e6.docx]

# Supplementary material:

## Questionnaire on the demand for teaching staff capacity of medical simulation in GenAI background

Dear Medical Students:

Hello! To improve the quality of medical simulation teaching and gain a deeper understanding of your needs regarding the capabilities of medical simulation educators in the context of the rapid development of generative artificial intelligence (hereinafter referred to as GenAI), we are conducting this survey. By participating in the survey, you can learn more about the knowledge required for medical simulation teaching faculty. There is no known risk associated with completing the questionnaire, and the data will be anonymized. Your responses are crucial to our research. This study is voluntary; if you do not wish to participate, you may exit the survey directly. If you can spare some valuable time to complete the questionnaire (approximately 3-5 minutes), it will be considered as informed consent and voluntary participation. Thank you again for your support and assistance in our research!

### Part one: basic information

1. Your gender is [multiple choice] *

○ Male

○ Female

2. Your age: [Multiple choice] *

○ Under 18 years of age

○18~25

○26~30

○31~40

○41~50

○51~60

○60 or more

3. Your educational background is: [Multiple choice] *

○ Medical students (including trainees and interns) in the program

○ Undergraduate medical students (including trainees and interns)

○ junior college

○ undergraduate course

○ Master

○ doctor

4. Your title is: [Multiple choice] *

○ not have

○ junior professional title

○ medium grade professional title

○ senior professional title

5. Your professional category is: [Single choice] *

○A. Nursing

○B. Clinical medicine

○C. Medical technology

6.How do you use generative artificial intelligence (GenAI)? [Multiple choice] *

(1) Generative AI: Focuses on generating new, similar but not identical data by learning from existing data.

(2) Generative artificial intelligence includes but is not limited to: text generation ChatGPT, DeepSeek, etc.; image generation DALL-E, Midjourney, etc.; audio generation WaveNet, MusicAutoBot, etc.; video generation Make-A-Video, videoGPT, etc.; cross-modal generation Stable Diffusion, etc.

○A, never used

○B. Used 1-2 types

○C. Use 3-5 kinds

○D. Used more than 6 kinds

### Part two: evaluates the importance of traditional medical simulation teaching faculty in the context of the development of generative artificial intelligence (GenAI) technology.

Please select a score from 1 to 5 according to how important you think each ability is. 1 means very unimportant and 5 means very important.

7. Solid medical knowledge: comprehensive and in-depth knowledge of basic medicine, clinical medicine, etc., able to accurately explain the relevant content of diseases. [Multiple choice] *

It's very unimportant very important

| ○1 | ○2 | ○3 | ○4 | ○5 |
| --- | --- | --- | --- | --- |

8. Rich clinical practice experience: a large number of clinical operation and diagnosis and treatment experience, can integrate cases into teaching. [Multiple choice] *

It's very unimportant very important

| ○1 | ○2 | ○3 | ○4 | ○5 |
| --- | --- | --- | --- | --- |

9. Ability to apply effective teaching methods: Master a variety of teaching methods and be able to flexibly choose them according to the situation. [Multiple choice] *

It's very unimportant very important

| ○1 | ○2 | ○3 | ○4 | ○5 |
| --- | --- | --- | --- | --- |

10. Good communication skills: Communicate clearly and accurately with students and patients, and give practical guidance. [Multiple choice] *

It's very unimportant very important

| ○1 | ○2 | ○3 | ○4 | ○5 |
| --- | --- | --- | --- | --- |

11. Learning guidance ability: help students make plans and develop independent learning habits. [Multiple choice] *

It's very unimportant very important

| ○1 | ○2 | ○3 | ○4 | ○5 |
| --- | --- | --- | --- | --- |

12. Course design and organization ability: Reasonable arrangement of teaching content and progress, coherent course logic. [Multiple choice] *

It's very unimportant very important

| ○1 | ○2 | ○3 | ○4 | ○5 |
| --- | --- | --- | --- | --- |

13. Teaching evaluation ability: can objectively evaluate students' achievements and give feedback through a variety of ways. [Multiple choice] *

It's very unimportant very important

| ○1 | ○2 | ○3 | ○4 | ○5 |
| --- | --- | --- | --- | --- |

14. Teamwork: effectively collaborate with other educators, medical staff, etc., to promote the growth of students. [Multiple choice] *

It's very unimportant very important

| ○1 | ○2 | ○3 | ○4 | ○5 |
| --- | --- | --- | --- | --- |

15. Professional ethics and humanistic literacy: abide by medical ethics, care for patients, and establish a good professional image. [Multiple choice] *

It's very unimportant very important

| ○1 | ○2 | ○3 | ○4 | ○5 |
| --- | --- | --- | --- | --- |

### Part three: In the context of the development of generative artificial intelligence (GenAI) technology, this paper evaluates the importance of GenAI related abilities of medical simulation teaching faculty.

Please choose from 1 to 5 points according to your degree of importance of GenAI related abilities, where 1 means very unimportant and 5 means very important.

16. GenAI tool application ability: Proficient in using generative AI tools, such as ChatGPT, DeepSeek, DALL-E, medical intelligent diagnostic software, etc., to assist teaching preparation and generation of teaching cases. [Multiple choice question] *

It's very unimportant very important

| ○1 | ○2 | ○3 | ○4 | ○5 |
| --- | --- | --- | --- | --- |

17. GenAI information discrimination ability: can identify the accuracy and reliability of medical information generated by GenAI, so as to avoid students receiving incorrect knowledge. [Multiple choice] *

It's very unimportant very important

| ○1 | ○2 | ○3 | ○4 | ○5 |
| --- | --- | --- | --- | --- |

18. GenAI-assisted teaching course design ability: Use GenAI to analyze students' learning data and design personalized teaching plans and course content according to individual differences. [Multiple choice] *

It's very unimportant very important

| ○1 | ○2 | ○3 | ○4 | ○5 |
| --- | --- | --- | --- | --- |

19. GenAI ethics and safety knowledge: Teach students about the ethical norms of GenAI in medical applications, such as data privacy protection, AI diagnostic responsibility definition, etc. [Multiple choice] *

It's very unimportant very important

| ○1 | ○2 | ○3 | ○4 | ○5 |
| --- | --- | --- | --- | --- |

20. Guide students to use GenAI learning ability: guide students to correctly use GenAI tools for medical knowledge learning, clinical case analysis, and cultivate students' critical thinking. [Multiple choice] *

It's very unimportant very important

| ○1 | ○2 | ○3 | ○4 | ○5 |
| --- | --- | --- | --- | --- |

21. GenAI related data analysis capability: the ability to analyze teaching data generated by GenAI (such as students 'knowledge, skills and other abilities), evaluate teaching effectiveness and students' learning situation, and provide basis for teaching decisions. [Multiple choice] *

It's very unimportant very important

| ○1 | ○2 | ○3 | ○4 | ○5 |
| --- | --- | --- | --- | --- |

22. Innovation ability of integrating GenAI technology with medical teaching: Explore the innovative integration of GenAI technology with traditional teaching methods, such as innovative design of medical simulation teaching cases, etc., to enrich the content and form of teaching. [Single choice question] *

It's very unimportant very important

| ○1 | ○2 | ○3 | ○4 | ○5 |
| --- | --- | --- | --- | --- |

1. In addition to the above, if you think there are other GenAI related capabilities that need attention, please fill in the following briefly [fill in the blanks]:

_________________________________

1. If you wish, please select the MBTI personality type you tested in the past 2 years [multiple choice] *

○A. Analysts, including: architect INTJ-A/INTJ-T, logician INTP-A/INTP-T, commander ENTJ-A/ENTJ-T, debater ENTP-A/ENTP-T

○B. Diplomats, including: Advocates INFJ-A/INFJ-T, Mediators INFP-A/INFP-T, protagonists ENFJ-A/ENFJ-T, and Campaigners ENFP-A/ENFP-T

○C. Guardians, including: Logisticsist ISTJ-A/ISTJ-T, Guardian ISFJ-A/ISFJ-T, General Manager ESTJ-A/ESTJ-T, and Governor ESFJ-A/ESFJ-T

○D. Explorers, including: connoisseurs ISTP-A/ISTP-T, explorers ISFP-A/ISFP-T, entrepreneurs ESTP-A/ESTP-T, performers ESFP-A/ESFP-T

○E. Not tested

25. Name of your undergraduate school [fill in the blank] *

_________________________________

**Thank you again for your support and cooperation!**
